# Supplementary material
Source: MDPI journal article supplement (https://www.mdpi.com/2073-4352/12/2/217)
Supplement: s1 [file s1]

## Supplementary Information

### Influence of conversion time and precursor density on the orientation of vapor-deposited ZIF-8

Marianne Kräuter<sup>1\*</sup>, Alexander John Cruz<sup>2</sup>, Timothée Stassin<sup>2</sup>, Sabina Rodríguez-Hermida<sup>2</sup>, Rob Ameloot<sup>2</sup>, Roland Resel<sup>1</sup>, Anna Maria Coclite<sup>1</sup>

<sup>1</sup> Institute of Solid State Physics, Graz University of Technology, Petersgasse 16, 8010 Graz, Austria

<sup>2</sup> Center for Membrane separations, Adsorption, Catalysis, and Spectroscopy (cMACS), KU Leuven, Celestijnenlaan 200F, 3001 Leuven, Belgium

\*[marianne.kraeuter@tugraz.at](mailto:marianne.kraeuter@tugraz.at); +43 316 873 - 8467

**Table S1.** Overview of the varied deposition parameters and of the properties of the synthesized ZIF-8, which were investigated to discern the impact of the varied deposition parameters.

| Varied parameters                                                       | Investigated properties of ZIF-8                                                                                                                                    |
|-------------------------------------------------------------------------|---------------------------------------------------------------------------------------------------------------------------------------------------------------------|
| precursor (ZnO) thickness<br>precursor (ZnO) density<br>conversion time | crystallinity and crystallographic orientation<br>morphology and spread on substrate<br>lateral and vertical crystallite size<br>layer roughness<br>layer thickness |

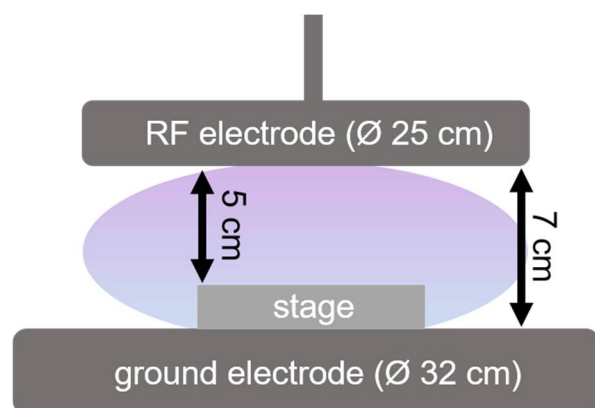

**Figure S1.** Schematic of the custom direct plasma atomic layer deposition reactor. The stage can be removed from the chamber, changing the distance between the electrodes from 5 cm to 7 cm.

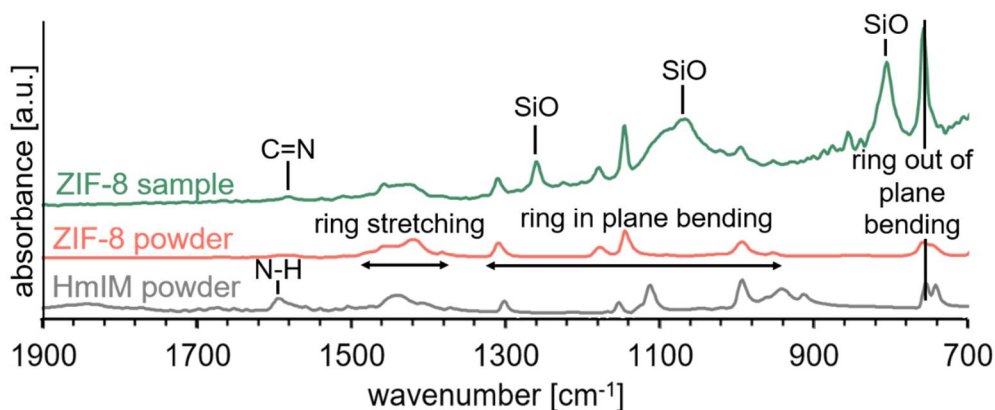

**Figure S2.** ZIF-8 obtained from a ZnO layer with a density of  $\rho = (4.6 \pm 0.1)$  g/cm<sup>3</sup> deposited for 60 cycles measured via attenuated total reflection Fourier-transform infrared spectroscopy. Reference data of ZIF-8 powder and 2-methylimidazole-powder are shown for comparison.

Figure S2 serves to show that the obtained layer matches the chemical fingerprint of ZIF-8. The N-H stretch is not visible in the ZIF-8 spectra but can be seen in the HmIm powder spectrum at 1590 cm<sup>-1</sup>. Between 1600 cm<sup>-1</sup> and 1000 cm<sup>-1</sup> the C-C, C=C, and C=N bonds of ZIF-8 become visible: From around 1480 cm<sup>-1</sup> to 1380 cm<sup>-1</sup> the stretching of the entire ring of ZIF-8 can be observed. Between 1305 cm<sup>-1</sup> and 950 cm<sup>-1</sup> the ring in-plane bending becomes visible, the peak at 755 cm<sup>-1</sup> indicates the ring out-of-plane bending. The peaks at 1260 cm<sup>-1</sup>, 1065 cm<sup>-1</sup>, and 805 cm<sup>-1</sup> are Si-O peaks arising from the native oxide of the substrate.

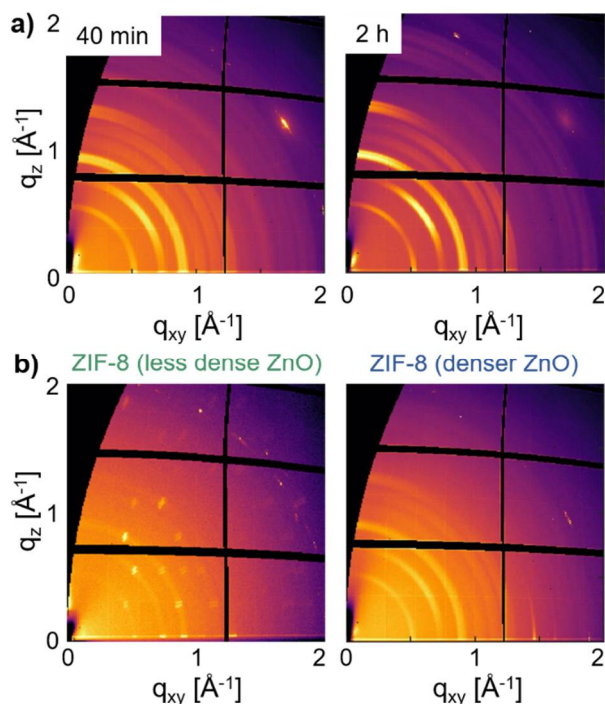

**Figure S3.** Grazing incidence X-ray diffraction data of ZIF-8 (a) grown from denser ZnO deposited for 60 cycles with conversion times of 40 min and 2 h. (b) obtained from ZnO deposited for 6 cycles with densities of  $\rho = (4.6 \pm 0.1)$  g/cm<sup>3</sup> and  $\rho = (5.2 \pm 0.2)$  g/cm<sup>3</sup> after 24 h of conversion.

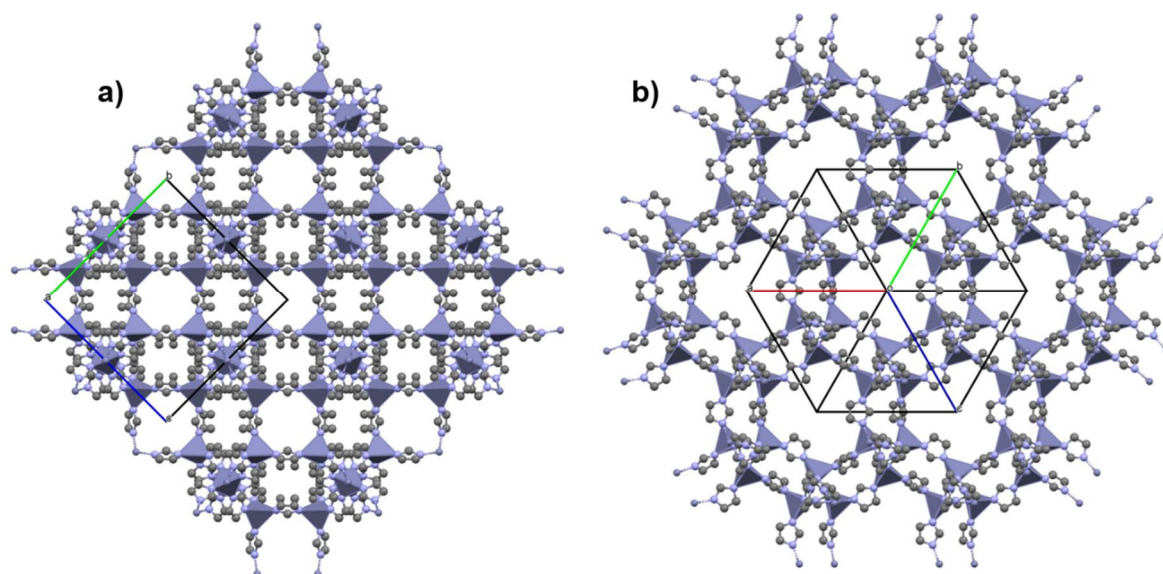

**Figure S4.** Structure of ZIF-8 plotted in Mercury. Dark-blue polyhedra correspond to zinc, pale-blue spheres to nitrogen and grey spheres to carbon. Hydrogen is not depicted for sake of clarity. The images show the top-down view of the (a) (100) and (b) (111) plane.

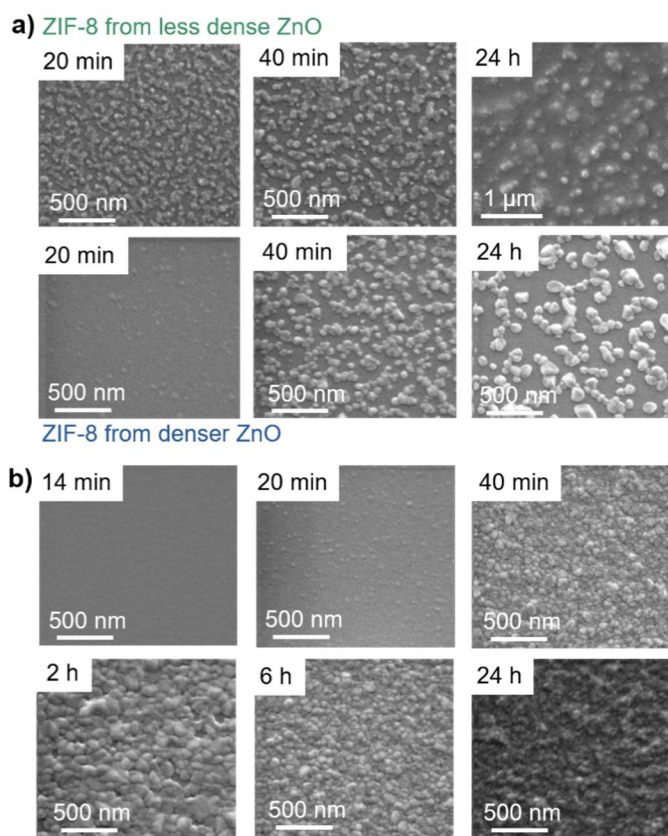

**Figure S5.** Scanning electron microscopy data showing ZIF-8 (a) obtained from ZnO layers deposited for 6 cycles with densities of  $\rho = (4.6 \pm 0.1) \text{ g/cm}^3$  and  $\rho = (5.2 \pm 0.2) \text{ g/cm}^3$  after different conversion times. (b) grown from denser ZnO deposited for 17 cycles after different conversion times.

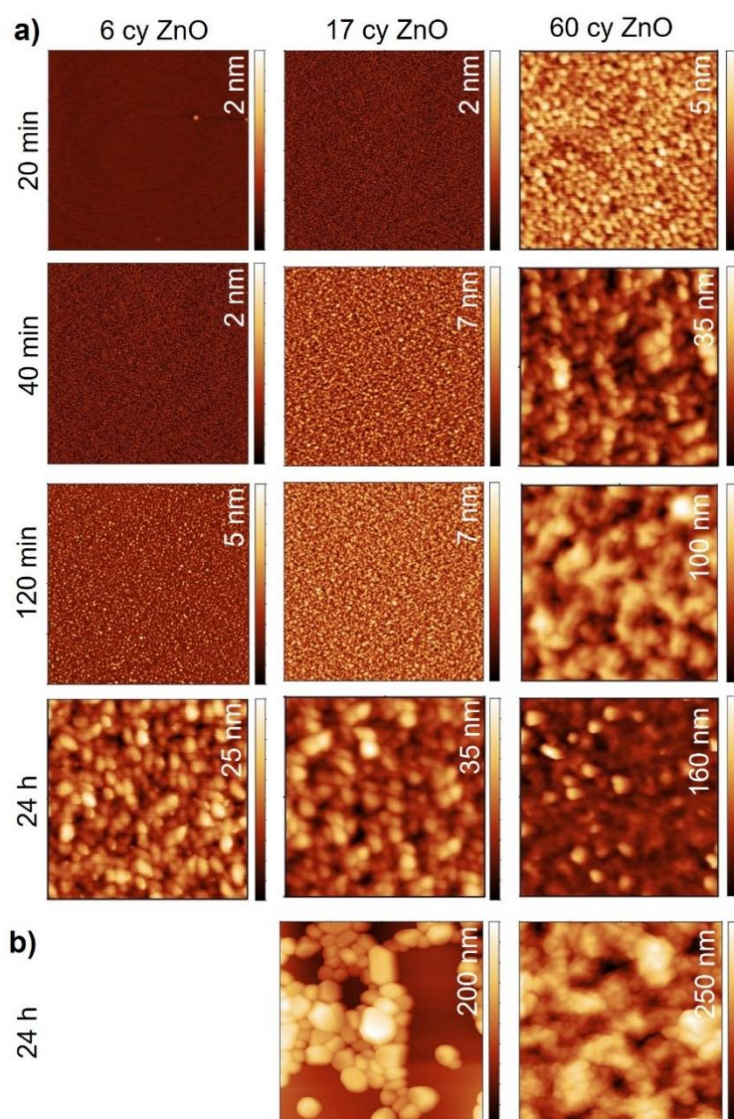

**Figure S6.** Atomic force microscopy topography images showing ZIF-8 (a) obtained from ZnO layers deposited for 6, 17 and 60 cycles with a density  $\rho = (5.2 \pm 0.2) \text{ g/cm}^3$  after different conversion times. (b) grown from ZnO with a density of  $\rho = (4.6 \pm 0.1) \text{ g/cm}^3$  deposited for 17 and 60 cycles after 24 h. All images are  $2 \times 2 \text{ }\mu\text{m}$  in size; the color scale of each image was individually adjusted for sake of visibility.
